# Supplementary material
Source: publisher site journal article supplement (https://www.dovepress.com/article/370577)
Supplement: Supplementary file 1 [file get_supplementary_file.php]

**Appendix S1**

**Methods**

**CAT/SGRQConversion**

The primary endpoint in the INTREPID trial was change from baseline of CAT score ≥2 at 24 weeks as a measure of disease-specific quality of life. SGRQ scores were not collected, however, the GALAXY model is designed to use treatment effect on SGRQ. Hence, regression equations were developed using data from two trials, FULFIL1 and IMPACT2, in COPD populations similar to INTREPID, and where both CAT and SGRQ scores were collected, to map the INTREPID trial-observed CAT scores to SGRQ scores. Slopes and intercepts for these regression equations are presented in Table S2. Patient data from IMPACT (N=10,355) were used to quantify previously observed relationships between CAT score and SGRQ score.3-5 Then, from a random sample of 50% of the dataset, a model with multiple covariates in addition to baseline CAT was developed for effect on change in SGRQ score. The model output was used to predict change from baseline in SGRQ score for the other 50% of patients to compare with the measured change.4 Correlation (r) values for regressions comparing SGRQ and CAT were 0.71 using baseline scores, 0.51 using change from baseline scores, and ranged from 0.74–0.75 (depending on treatment) for on-treatment scores. The model-predicted change in SGRQ score when compared to observed change showed moderate correlation at a population level, but a high degree of variation at an individual patient level.4 Due to uncertainties around the model input values for this conversion, particularly the change from baseline (on treatment) equations due to variability in the data, one-way sensitivity analyses were carried out. SGRQ values calculated based on IMPACT baseline regression were used in the base-case. Regression equations were derived in the same way using baseline, 52-week, and change from baseline data from IMPACT, and baseline, 24-week, and change from baseline data from the FULFIL trial and used in scenario analyses.

**Derivation of Baseline mMRC**

The GALAXY model baseline parameter inputs required the proportion of patients with mMRC ≥2. Based on a publication by Jones et al.,6 the proportion of patients with a CAT score ≥21 was assumed to be the same as the proportion of patients with mMRC ≥2.

**Derivation of Baseline Fibrinogen**

A previously developed risk equation to predict fibrinogen level based on other concurrent baseline parameter values was used. This risk equation was developed through analysis of data from the ECLIPSE study7 in patients with complete baseline data that included fibrinogen values (n=1,957). The most efficient model in the analysis included the following covariates for prediction of fibrinogen: age, FEV1 volume in liters, smoking status, ≥1 exacerbations in the preceding 12 months, and BMI (both low and high categories relative to the reference [middle] category). This equation was used to estimate baseline fibrinogen in the INTREPID cohort.

**Derivation of Baseline 6MWT**

A previously developed risk equation in the GALAXY model based on age, fibrinogen, gender distribution of the cohort, FEV1 percent predicted, height, cardiovascular comorbidity, mMRC score, and BMI>30 mg/m2, was used to estimate baseline 6MWT in the INTREPID population.

**One Way Sensitivity Analyses**

One-way sensitivity analyses were conducted on baseline covariate values that were not available from INTREPID data, and FF/UMEC/VI treatment effects on SGRQ response and FEV1 (Tables S6 and S7). The upper and lower values for the one-way sensitivity analyses were obtained as follows. For baseline fibrinogen and 6MWT, the values used in the base-case were predicted rather than observed. A range for the sensitivity analysis was determined by approximating a 95% CI using data from the ECLIPSE trial. Mean (95% CI) fibrinogen from ECLIPSE was 460.5 mcg/dL (455.8, 465.1) and the mean (95% CI) distance for 6MWT was 373.3 m (367.9, 378.7). The standard error was calculated and applied to the predicted value for fibrinogen or 6MWT in the model base-case. For baseline mMRC, since analogous data were used, it was not possible to approximate a 95% CI. Therefore, the value was varied plus and minus 25%, relative to the base-case value, in the one-way sensitivity analyses. Similarly, baseline SGRQ scores were estimated from CAT scores and varied plus and minus 25%, relative to the base-case value. For FEV1 increment treatment effect, a 95% CI around the mean value used in the base-case was available from INTREPID data, and the upper and lower confidence limits were used. For SGRQ change from baseline (derived from CAT score), the value was varied plus and minus 25%, relative to the base-case value.

**Table S1** Patient Characteristics at Baseline (ITT Population, INTREPID Trial)

|  | **FF/UMEC/VI**  **(n=1,545)** | **Non-ELLIPTA MITT**  **(n=1,547)** |
| --- | --- | --- |
| Age, years (SD) | 67.8 (8.78) | 67.8 (8.59) |
| Male sex, n (%) | 837 (54) | 818 (53) |
| Duration of COPD, n (%) |  |  |
| <5 years | 380 (25) | 394 (25) |
| ≥5 years to <10 years | 546 (35) | 545 (35) |
| ≥10 years to <15 years | 370 (24) | 369 (24) |
| ≥15 years | 249 (16) | 238 (15) |
| Number of moderate/severe COPD exacerbations in previous 12 months, n (%) |  |  |
| 0 | 363 (23) | 361 (23) |
| 1 | 615 (40) | 610 (39) |
| ≥2 | 567 (37) | 576 (37) |
| CAT score (at screening), mean (SD) | 20.8 (6.76) | 20.5 (6.62) |
| Prior medication use, n (%) |  |  |
| ICS + LABA + LAMA | 1,226 (79) | 1,235 (80) |
| ICS + LABA | 126 (8) | 126 (8) |
| LABA + LAMA | 192 (12) | 183 (12) |
| Missing information on prior medication | 1 (<1) | 3 (<1) |
| Lung function, mean (SD)a | n=910 | n=904 |
| Pre-bronchodilator FEV1 (L) | 1.369 (0.55) | 1.333 (0.56) |
| Post-bronchodilator FEV1 (L) | 1.474 (0.57) | 1.462 (0.58) |
| Post-bronchodilator FEV1 % predicted | 54.1 (18.49) | 54.1 (18.58) |

**Note:** aDue to the sample size required, spirometry data were only collected in a subset of patients, which in turn minimized the disruption to usual care. Trough FEV1 was a further subset, as spirometry data were not required to be trough in the INTREPID trial.
**Abbreviations:** CAT, COPD Assessment Test, COPD, chronic obstructive pulmonary disease; FEV1, forced expiratory volume in 1 second; FF, fluticasone furoate; ICS, inhaled corticosteroid, ITT, intent-to-treat, LABA, long-acting β2-agonist, LAMA, long-acting muscarinic antagonist, L, liter; MITT; multiple-inhaler triple therapy, SD, standard deviation; UMEC, umeclidinium; VI, vilanterol.

**Table S2** Slope and intercept regression components for SGRQ estimation

|  | **Baseline (ITT population)** | | **On treatmenta (FF/UMEC/VI)** | | **Change from baseline (FF/UMEC/VI)** | |
| --- | --- | --- | --- | --- | --- | --- |
|  | **Slope** | **Intercept** | **Slope** | **Intercept** | **Slope** | **Intercept** |
| **IMPACT** | N=10,355 | | n=4,151 | | n=4,151 | |
| 1.71 | 19.5 | 1.86 | 14.59 | 1.18 | −3.29 |
| **FULFIL** | N=1,810 | | n=911 | | n=911 | |
| 1.79 | 19.6 | 1.97 | 15.04 | 1.41 | −3.18 |

**Notes**: Data from GSK.8 a52-week data for IMPACT; 24-week data for FULFIL.
**Abbreviations**: FF, fluticasone furoate; SGRG, St. George’s Respiratory Questionnaire; UMEC, umeclidinium; VI, vilanterol.

**Table S3** Subsequent treatment

| **Subsequent therapy medications** | **Patients receiving treatment, %** | | **Patients receiving treatment  (re-normalizeda), %** | |
| --- | --- | --- | --- | --- |
| **FF/UMEC/VI** | **Non-ELLIPTA MITT** | **FF/UMEC/VI** | **Non-ELLIPTA MITT** |
| No treatment after randomized treatment | 83.17 | 90.76 |  |  |
| ICS+LABA+LAMA (MITT and SITT) | 13.4 | 6.8 | 84.15 | 77.2 |
| ICS+LABA | 1.1 | 0.9 | 6.91 | 10.3 |
| LAMA+LABA | 1.3 | 1.0 | 8.13 | 11.0 |
| LAMA | 0.1 | 0.1 | 0.81 | 1.5 |
| Other | 0.91 | 0.45 |  |  |

**Note:** aThe proportion of patents receiving each class of therapy was re-normalized in line with assumption of 100% patients receiving subsequent treatment.

**Abbreviations:** FF, fluticasone furoate; ICS, inhaled corticosteroid, LABA, long-acting β2-agonist, LAMA, long-acting muscarinic antagonist; MITT, multiple inhaler triple therapy; SITT, single-inhaler triple therapy; UMEC, umeclidinium; VI, vilanterol.

**Table S4** Drug Unit Costs, 2020 GBP

**Notes:** Data from National Institute for Health and Care Excellence.**9** The daily weighted average cost of subsequent therapy for FF/UMEC/VI and non-ELLIPTA MITT was based on the re-normalized percentage of patients receiving treatment (Table S2).

|  | **Cost per day** |
| --- | --- |
| FF/UMEC/VI | 1.48 |
| Non-Ellipta MITT | 1.90 |
| **Subsequent therapy medications** | **Weighted average cost per day** |
| ICS+LABA+LAMA (MITT and SITT) | 1.72 |
| ICS+LABA | 0.87 |
| LAMA+LABA | 1.08 |
| LAMA | 1.02 |
| **Weighted average cost for subsequent therapy** |  |
| FF/UMEC/VI | 1.61 |
| Non-Ellipta MITT | 1.55 |

**Abbreviations:** FF, fluticasone furoate; GBP, British Pound; ICS, inhaled corticosteroid, LABA, long-acting β2-agonist, LAMA, long-acting muscarinic antagonist; MITT, multiple inhaler triple therapy; SITT, single-inhaler triple therapy; UMEC, umeclidinium; VI, vilanterol.

**Table S5** Health State and Exacerbation Costs, 2020 GBP

**Notes:** Data from National Institute for Health and Care Exvellence.**10** Unit costs were inflated to 2020 values using the Consumer Price Index.11

**Abbreviations:** FEV1, forced expiratory volume in 1 second.

|  | **Total management cost per year or exacerbation** |
| --- | --- |
| **Health state** |  |
| Moderate to severe (FEV1 % predicted 80–50%) | 119 |
| Severe (FEV1 % predicted <50% to 30%) | 793 |
| Very severe (FEV1 % predicted <30%) | 1,472 |
| **Exacerbation** |  |
| Moderate | 82 |
| Severe | 2,220 |

**Table S6** One-Way Sensitivity Analyses Input Values

|  | **Vs non-ELLIPTA MITT** | | |
| --- | --- | --- | --- |
|  | **Base-case** | **Lower value** | **Upper value** |
| **Baseline values not available from INTREPID** |  |  |  |
| Fibrinogen (µg/dL) | 474.3 | 469.6 | 478.9 |
| 6MWT (m) | 365.0 | 359.7 | 370.4 |
| mMRC score, % | 46.6 | 35.0 | 58.3 |
| SGRQ score, mean | 54.9 | 41.2 | 68.6 |
| **Treatment effects (difference in change from baseline)** |  |  |  |
| FEV1 increment (mL) | 50 | 26 | 73 |
| SGRQ change | −2.66 | −2.00 | −3.33 |

**Abbreviations:** 6MWT, six-minute walk test;µg, microgram; dL, deciliter; FEV1, forced expiratory volume in one second; m, meter; mL, milliliter; MITT, multiple inhaler triple therapy; mMRC, modified Medical Research Council; SGRQ, St. George’s Respiratory Questionnaire.

**Table S7** Sensitivity Analysis Results (FF/UMEC/VI versus Non-ELLIPTA MITT)

| **Scenario** | **Incremental LYs** | **Incremental QALYs** | **Incremental costs** | **ICER/QALY** |
| --- | --- | --- | --- | --- |
| **Base-case** | **0.174** | **0.253** | **–£1,764** | **Dominant** |
| **Baseline parameters** | | | | |
| Fibrinogen lower CI using ECLIPSE data | 0.180 | 0.255 | –£1,774 | **Dominant** |
| Fibrinogen upper CI using ECLIPSE data | 0.174 | 0.252 | –£1,757 | **Dominant** |
| 6MWT lower CI using ECLIPSE data | 0.174 | 0.253 | –£1,764 | **Dominant** |
| 6MWT upper CI using ECLIPSE data | 0.175 | 0.253 | –£1,776 | **Dominant** |
| mMRC –25% | 0.182 | 0.257 | –£1,782 | **Dominant** |
| mMRC +25% | 0.172 | 0.251 | –£1,749 | **Dominant** |
| SGRQ –25% | 0.191 | 0.247 | –£1,798 | **Dominant** |
| SGRQ +25% | 0.165 | 0.256 | –£1,374 | **Dominant** |
| **Treatment effects** | | | | |
| FEV1 lower CI | 0.090 | 0.223 | –£1,394 | **Dominant** |
| FEV1 upper CI | 0.261 | 0.283 | –£2,097 | **Dominant** |
| SGRQ –25% | 0.174 | 0.205 | –£1,764 | **Dominant** |
| SGRQ +25% | 0.174 | 0.300 | –£1,764 | **Dominant** |

**Abbreviations:** 6MWT, 6-minute walk test; CI, confidence interval; COPD, chronic obstructive pulmonary disease; FEV1, forced expiratory volume in one second; FF, fluticasone furoate; ICER, incremental cost-effectiveness ratio; LY, life year; MITT; multiple‑inhaler triple therapy; mMRC, modified Medical Research Council; QALY, quality-adjusted life year; SGRQ, St. George’s Respiratory Questionnaire; UMEC, umeclidinium; VI, vilanterol.

**References**

1. Lipson DA, Barnacle H, Birk R, et al. FULFIL Trial: Once-Daily Triple Therapy for Patients with Chronic Obstructive Pulmonary Disease. *Am J Respir Crit Care Med.* 2017;196(4):438-446.

2. Lipson DA, Barnhart F, Brealey N, et al. Once-daily single-inhaler triple versus dual therapy in patients with COPD. *N Engl J Med.* 2018;378(18):1671-1680.

3. Jones PW, Brusselle G, Dal Negro RW, et al. Properties of the COPD assessment test in a cross-sectional European study. *Eur Respir J.* 2011;38(1):29-35.

4. Jones P, Shukla S, Tombs L, et al. Predicting SGRQ score based on CAT score: post-hoc analysis of the IMPACT trial. Paper presented at: European Respiratory Society Congress; September 4–8, 2021; Barcelona, Spain.

5. Jones P, Shukla S, Tombs L, et al. Uncovering the relationship between the COPD assessment test and St George's Respiratory Questionnaire in patients with chronic obstructive pulmonary disease: a post-hoc analysis of IMPACT, FULFIL, and EMAX trials. Paper presented at: American Thoracic Society International Conference. TP121. TP121 COPD: from cells to the clinic; May 14-19, 2021; virtual event. Abstract A4565-A4565.

6. Jones PW, Adamek L, Nadeau G, Banik N. Comparisons of health status scores with MRC grades in COPD: implications for the GOLD 2011 classification. *Eur Respir J.* 2013;42(3):647-654.

7. Vestbo J, Anderson W, Coxson HO, et al. Evaluation of COPD longitudinally to identify predictive surrogate end-points (ECLIPSE). *Eur Respir J.* 2008;31(4):869-873.

8. GSK. Data on file: SGRQ/CAT conversion analysis. In:2020.

9. BNF. British National Formulary. 2020; <https://bnf.nice.org.uk/>. Accessed September 15, 2021.

10. NICE. Chronic obstructive disease in over 16s: diagnosis and management. Economic model report. 2018; <https://www.nice.org.uk/guidance/ng115/documents/economic-report>. Accessed September 15, 2021.

11. ONS. Office of National Statistics (ONS). Consumer price index. 2020; <https://www.ons.gov.uk/economy/inflationandpriceindices/timeseries/l522/mm23>. Accessed September 15, 2021.
